# Supplementary material for: Luminescent GaN semiconductor based on surface modification with lanthanide complexes through an ionic liquid bridge
Source: Royal Society of Chemistry journal article supplement (doi:10.1039/c2ra20582c), 2012-01-01
Supplement: c2ra20582c.pdf [file c2ra20582c.pdf]

## Supporting Information

### 1 Physical measurements

Fourier transform infrared spectra (FTIR) are measured within KBr slices from 4000-400  $\text{cm}^{-1}$  using a Nexus 912 AO446 infrared spectrum radiometer. X-ray powder diffraction patterns (XRD) are acquired on Rigaku D/max-Rb diffractometer equipped with Cu anode; the data are collected within the  $2\theta$  range of  $10^\circ$ - $70^\circ$ . Luminescence excitation and emission spectra are measured on a RF-5301 fluorescence photometer. Luminescence lifetimes ( $\tau$ ) are examined by an Edinburgh Instruments FLS 920 phosphormeter. Scanning electronic microscope (SEM) images are obtained with a Hitachi S-4800. The diffuse reflectance UV-Vis spectra of the powdered samples are recorded by a BWS003 spectrophotometer. The NMR spectra were recorded in deuterated solvents on Bruker ARX400. Thermogravimetric analysis (TG) is measure using a Netzsch STA 449C system at a heating rate of 5  $^\circ\text{C}/\text{min}$  under the nitrogen protection.

XPS experiments were carried out on a RBD upgraded PHI-5000C ESCA system (Perkin Elmer) with Mg  $K\alpha$  radiation ( $h\nu = 1253.6 \text{ eV}$ ) or Al  $K\alpha$  radiation ( $h\nu = 1486.6 \text{ eV}$ ). In general, the X-ray anode was run at 250W and the high voltage was kept at 14.0 kV with a detection angle at  $54^\circ$ . The pass energy was fixed at 23.5, 46.95 or 93.90 eV to ensure sufficient resolution and sensitivity. The base pressure of the analyzer chamber was about  $5 \times 10^{-8} \text{ Pa}$ . The sample was directly pressed to a self-supported disk ( $10 \times 10 \text{ mm}$ ) and mounted on a sample holder then transferred into the analyzer chamber. The whole spectra (0~1100 (1200)eV) and the narrow spectra of all the elements with much high resolution were both recorded by using RBD 147 interface ( RBD Enterprises, USA) through the AugerScan 3.21 software. Binding energies were calibrated by using the containment carbon ( $\text{C}1s = 284.6\text{eV}$ ). The data analysis was carried out by using the RBD AugerScan 3.21 software provided by RBD Enterprises.

**Fig. S1 X-ray Diffraction (XRD) patterns for the pure GaN and GaN-IM<sup>+</sup>-[Eu(TTA)<sub>4</sub>]<sup>-</sup>.**

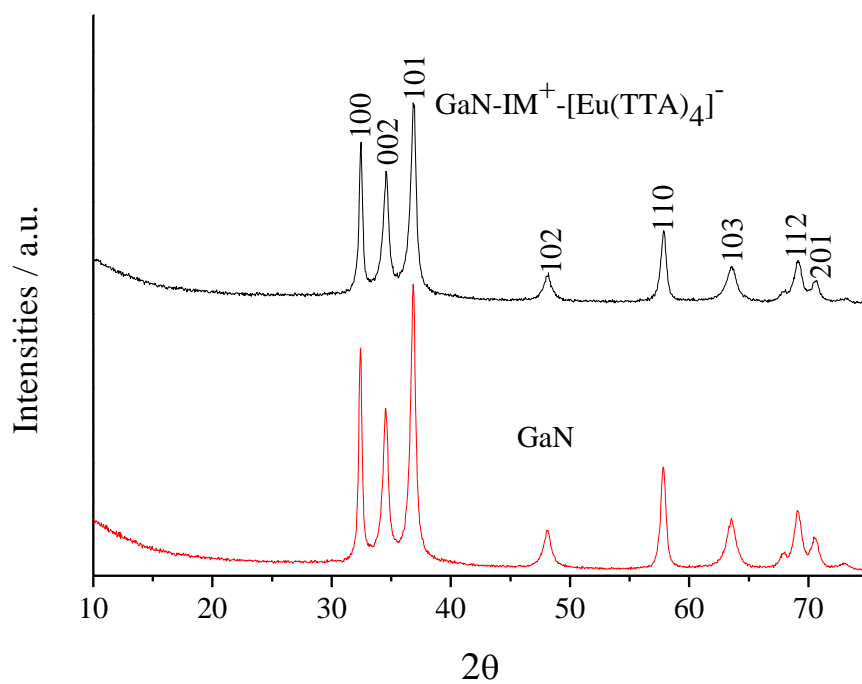

Fig. S1

**Fig. S2 SEM image of the GaN-IM<sup>+</sup>-[Eu(TTA)<sub>4</sub>]<sup>-</sup>.**

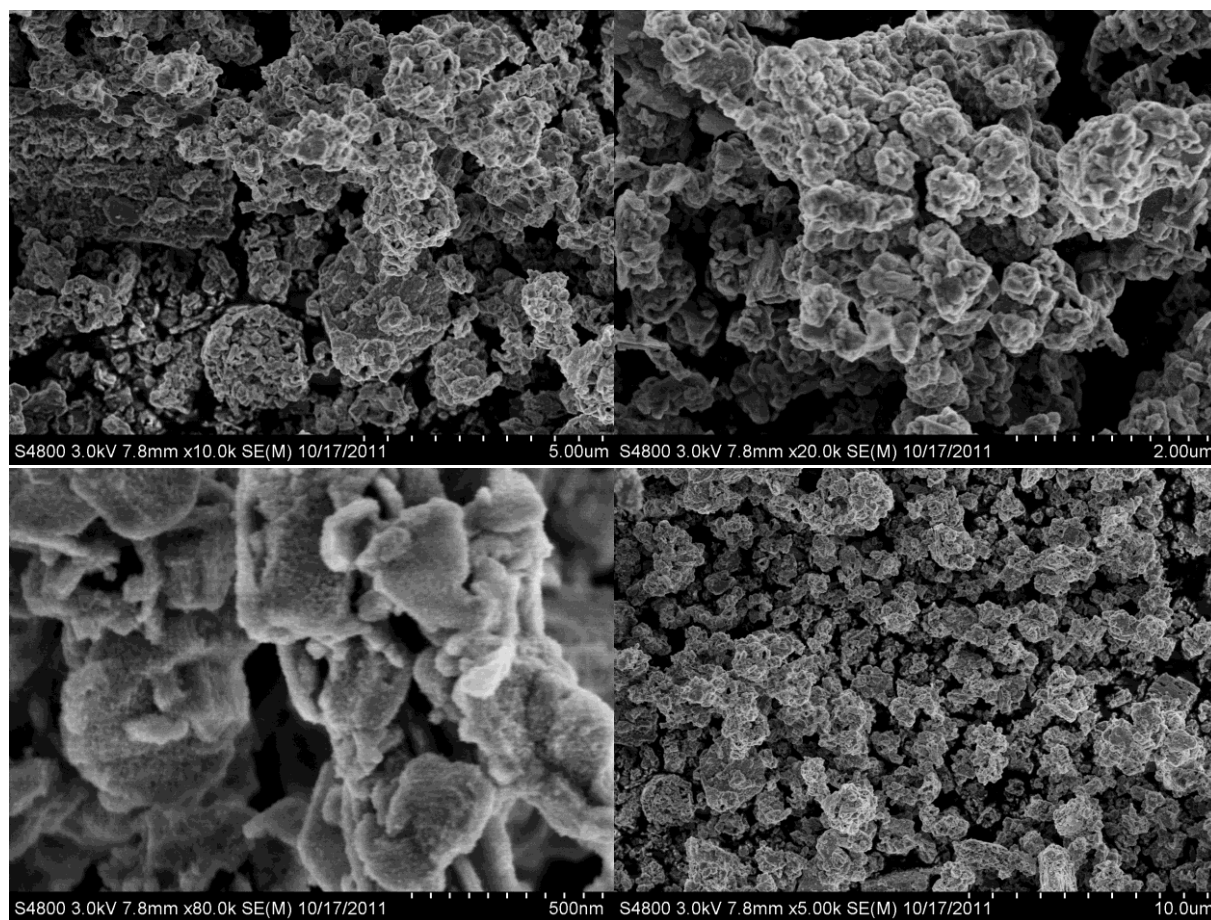

**Fig. S2**

**Fig. S3** Ultraviolet–visible diffuse refraction absorption spectra for  $\text{GaN-IM}^+ \cdot [\text{Eu}(\text{TTA})_4]^-$ .

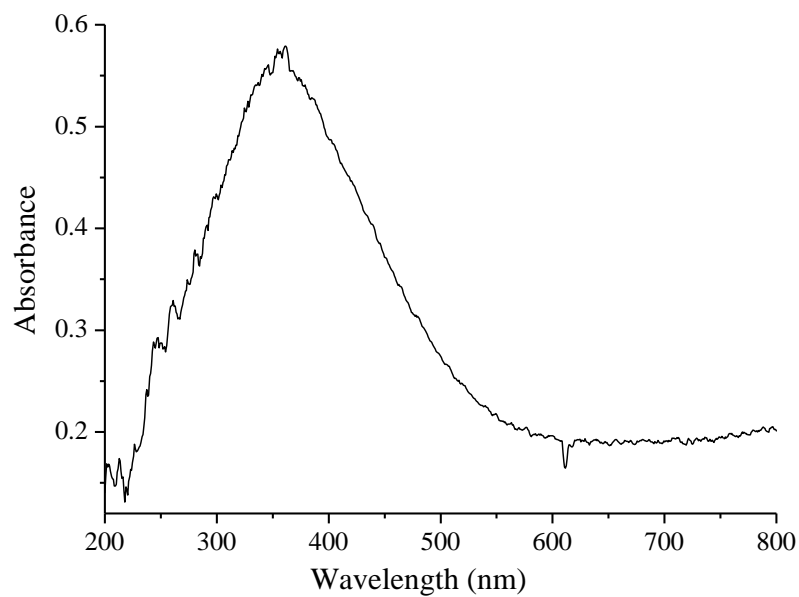

Fig. S3

**Table S1** Luminescence efficiency and lifetime for the GaN-IM<sup>+</sup>-[Eu(TTA)<sub>4</sub>]<sup>-</sup>.

| Sample                                                    | I <sub>02</sub> /I <sub>01</sub> | τ (μs) <sup>1</sup> | 1/τ (s <sup>-1</sup> ) | A <sub>r</sub> (s <sup>-1</sup> ) | A <sub>nr</sub> (s <sup>-1</sup> ) | η (%) |
|-----------------------------------------------------------|----------------------------------|---------------------|------------------------|-----------------------------------|------------------------------------|-------|
| GaN-IM <sup>+</sup> -[Eu(TTA) <sub>4</sub> ] <sup>-</sup> | 16.1                             | 316                 | 3165                   | 831                               | 2334                               | 26.3  |

The emission quantum efficiency of the <sup>5</sup>D<sub>0</sub> europium ion excited state for GaN-IM<sup>+</sup>-[Eu(TTA)<sub>4</sub>]<sup>-</sup> is calculated using the following equations:

$$A_{0J} = A_{01} \times \frac{I_{0J}}{I_{01}} \times \frac{\nu_{01}}{\nu_{0J}}$$

$$A_r = \sum A_{0J} = A_{00} + A_{01} + A_{02} + A_{03} + A_{04}$$

$$\frac{1}{\tau} = A_r + A_{nr}$$

$$\eta = \frac{A_r}{A_r + A_{nr}}$$

Here A<sub>0J</sub> is the experimental coefficient of spontaneous emissions. A<sub>r</sub> and A<sub>nr</sub> are the radiative and nonradiative transition rates, respectively. I<sub>0J</sub> is the emission intensity and can be taken as the integrated intensities of the <sup>5</sup>D<sub>0</sub>→<sup>7</sup>F<sub>J</sub> (J=0–4) emission bands, while the ν<sub>0J</sub> refers to corresponding energy barycenter and can also be determined from their emission bands. Since the A<sub>01</sub> is the Einstein's coefficient of spontaneous emission between the <sup>5</sup>D<sub>0</sub> and <sup>7</sup>F<sub>1</sub>, whose value is given by the equation A<sub>01</sub> = 0.31×10<sup>-11</sup>n<sup>3</sup>(ν<sub>01</sub>)<sup>3</sup>. When an average index of refraction n = 1.506 is considered, the value of A<sub>01</sub> can be determined to be 50 s<sup>-1</sup> approximately.
